# Supplementary material for: African Migrant Patients’ Trust in Chinese Physicians: A Social Ecological Approach to Understanding Patient-Physician Trust
Source: PLoS One. 2015 May 12;10(5):e0123255. doi: 10.1371/journal.pone.0123255 (PMC4428824; doi:10.1371/journal.pone.0123255)
Supplement: S1 Table — (PDF) [file pone.0123255.s001.pdf]

**Table S1. Demographic characteristics of African migrants interviewed**

| No. | Country of origin | Time in China                                                                                | Sex | Age (years) | Occupation | Education level                      | Mandarin proficiency | English proficiency | Other languages spoken                  |
|-----|-------------------|----------------------------------------------------------------------------------------------|-----|-------------|------------|--------------------------------------|----------------------|---------------------|-----------------------------------------|
| 1   | Nigeria           | 1 week                                                                                       | M   | 40          | trader     | bachelor's                           | none                 | convesational       | Yoruba                                  |
| 2   | Guinea            | 5 years                                                                                      | M   | 21          | trader     | high school                          | advanced             | intermediate        | Fula, French                            |
| 3   | Mali              | 6 months<br>has been visiting China for several years, usually making a visit every 2 months | M   | 29          | trader     | high school                          | basic                | intermediate        | Bambara, French                         |
| 4   | Mali              |                                                                                              | M   | 44          | trader     | high school primary school           | none                 | intermediate        | Bambara, French<br>Susu, French, Yoruba |
| 5   | Guinea            | 5 years<br>has been visiting China for 13 years, usually making trips twice a year           | M   | 35          | trader     |                                      | none                 | intermediate        |                                         |
| 6   | Guinea            | has been visiting China for 8 years, longest stay was 3 years                                | M   | 42          | trader     | high school                          | very basic           | intermediate        | Susu, French, Malinké                   |
| 7   | Guinea            |                                                                                              | M   | 52          | trader     | elementary school<br>some university | none                 | intermediate        | French                                  |
| 8   | Niger             | 4 years                                                                                      | M   | 32          | trader     | master's                             | intermediate         | intermediate        | French                                  |
| 9   | Sierra Leone      | 17 years                                                                                     | F   | 41          | trader     |                                      | fluent               | fluent              |                                         |
| 10  | Guinea            | 7 years                                                                                      | M   | 36          | trader     | bachelor's<br>some university        | basic                | conversational      | Malinké, French, some Arabic            |
| 11  | Senegal           | 9 years                                                                                      | M   | 32          | trader     | some high school                     | very basic           | intermediate        | Wolof, French                           |
| 12  | Nigeria           | 2 years, 6 months                                                                            | M   | 36          | trader     | some university                      | very basic           | intermediate        | Igbo                                    |
| 13  | Nigeria           | 12 years                                                                                     | M   | 36          | trader     | high school                          | intermediate         | conversational      | Igbo, French                            |
| 14  | Nigeria           | 5 years                                                                                      | M   | 40          | trader     | some high school                     | basic                | intermediate        | Igbo                                    |
| 15  | Nigeria           | 6 years                                                                                      | M   | 35          | trader     | high school                          | basic                | intermediate        | Igbo                                    |
| 16  | Nigeria           | 5 years                                                                                      | M   | 36          | trader     | some university                      | basic                | intermediate        | Igbo                                    |
| 17  | Nigeria           | 1 year                                                                                       | M   | 27          | trader     | some university                      | basic                | intermediate        | Igbo                                    |
| 18  | Nigeria           | has been visiting for 7-8 years,                                                             | M   | 40          | trader     | university                           | very basic           | conversational      | Igbo                                    |

|    |                              |                                                                                  |   |    |                |                 |              |                |                                                               |
|----|------------------------------|----------------------------------------------------------------------------------|---|----|----------------|-----------------|--------------|----------------|---------------------------------------------------------------|
|    |                              | makes 3-5 month-long trips each year                                             |   |    |                |                 |              |                |                                                               |
|    |                              | has been visiting China 2-3 times per year for last 2 years                      |   |    |                |                 |              |                |                                                               |
| 19 | Nigeria                      |                                                                                  | M | 29 | trader         | high school     | very basic   | intermediate   | Igbo                                                          |
| 20 | Nigeria                      | 6 years                                                                          | M | 33 | trader         | bachelor's      | basic        | conversational | Igbo                                                          |
| 21 | Nigeria                      | less than 1 year                                                                 | M | 29 | trader         | bachelor's      | advanced     | intermediate   | Igbo, Hausa                                                   |
| 22 | Nigeria                      | 11 years                                                                         | M | 43 | trader         | high school     | basic        | conversational | Igbo, some French                                             |
|    |                              |                                                                                  |   |    |                |                 |              |                | Twi, three other Ghanaian languages, some Turkish and Russian |
| 23 | Ghana                        | 11 years                                                                         | M | 39 | trader         | bachelor's      | advanced     | fluent         | Yoruba                                                        |
| 24 | Nigeria                      | 9 years                                                                          | M | 38 | trader         | bachelor's      | advanced     | fluent         |                                                               |
|    |                              | has been visiting China for 6 years, has lived in China continuously for 2 years |   |    |                |                 |              |                |                                                               |
| 25 | Nigeria                      |                                                                                  | M | 31 | trader         | primary school  | basic        | intermediate   | Igbo                                                          |
| 26 | Ethiopia                     | 1 year, 2 months                                                                 | M | 23 | trader         | master's        | none         | conversational | Amharic, Oromigna                                             |
|    |                              |                                                                                  |   |    |                |                 |              |                | Swahili, some Arabic, some German                             |
| 27 | Kenya                        | 2 years                                                                          | M | 53 | trader         | some university | basic        | conversational | Igbo                                                          |
| 28 | Nigeria                      | 5 years                                                                          | M | 33 | trader         | high school     | basic        | intermediate   | Igbo                                                          |
| 29 | Nigeria                      | 1 year                                                                           | M | 30 | trader         | high school     | very basic   | intermediate   | Igbo                                                          |
|    |                              |                                                                                  |   |    |                |                 |              |                | French, some Hausa, some Ghanaian languages                   |
| 30 | Niger                        | 1 month                                                                          | M | 37 | trader/student | bachelor's      | basic        | intermediate   | Cisena                                                        |
| 31 | Mozambique                   | 6 years                                                                          | M | 30 | trader/student | master's        | intermediate | fluent         | Shona                                                         |
| 32 | Zimbabwe                     | 4 months                                                                         | M | 23 | student        | bachelor's      | intermediate | fluent         | Shona                                                         |
| 33 | Zimbabwe                     | 9 months                                                                         | F | 28 | student        | bachelor's      | very basic   | fluent         | Shona                                                         |
| 34 | Zimbabwe                     | 9 months                                                                         | M | 36 | student        | bachelor's      | very basic   | fluent         | Shona                                                         |
| 35 | Ghana                        | 1 year, 10 months                                                                | M | 27 | student        | bachelor's      | none         | fluent         | Twi                                                           |
|    | Democratic Republic of Congo |                                                                                  |   |    |                |                 |              |                | French, Lingala, Swahili, a little Russian and                |
| 36 |                              | 6 years                                                                          | M | 25 | student        | bachelor's      | advanced     | conversational |                                                               |

|    |        |                   |   |    |                       |                      |       |              |                                    |
|----|--------|-------------------|---|----|-----------------------|----------------------|-------|--------------|------------------------------------|
| 37 | Gambia | 1 month           | M | 28 | student               | high school          | none  | intermediate | Spanish<br>Mandinka, Wolof         |
| 38 | Gambia | less than 1 month | M | 25 | student<br>restaurant | vocational<br>school | basic | intermediate | Mandinka, Wolof<br>Tooro, Swahili, |
| 39 | Uganda | 2 years           | F | 28 | worker                | bachelor's           | none  | intermediate | some French                        |
| 40 | Ghana  | 10 years          | F | 33 | homemaker             | bachelor's           | basic | fluent       | Twi                                |
